# Supplementary material
Source: publisher figshare collection journal article supplement (https://gsapubs.figshare.com/articles/dataset/_/12541778)

Yilong Li, Jianping Zheng, Wenjiao Xiao, Guoqing Wang, and Fraukje M. Brouwer, 2019, Circa 2.5 Ga granitoids in the eastern North China craton: Melting from ca. 2.7 Ga accretionary crust: GSA Bulletin, <https://doi.org/10.1130/B35091.1>.

## Data Repository

Figure DR1. Cathodoluminescence images of zircon grains from granitoids from JLK, AZL and QHD plutons. The values of  $\epsilon\text{Hf}_{(t)}$  and U-Pb age are given in the yellow and white circles, respectively.

Table DR1. Chemical composition of granitoids from JLK, AZL and QHD plutons in the eastern Hebei Province.

Table DR2. The analytical results of U-Pb dating for the zircon standard GJ-1 and Hf isotope ratios for zircon 91500, GJ-1 and TEMORA.

Table DR3. LA-ICP-MS zircon U-Pb data for granitoids from JLK, AZL and QHD plutons in the eastern Hebei Province.

Table DR4. LA-MC-ICPMS zircon Hf-isotope data for granitoids from JLK, AZL and QHD plutons in the eastern Hebei Province.

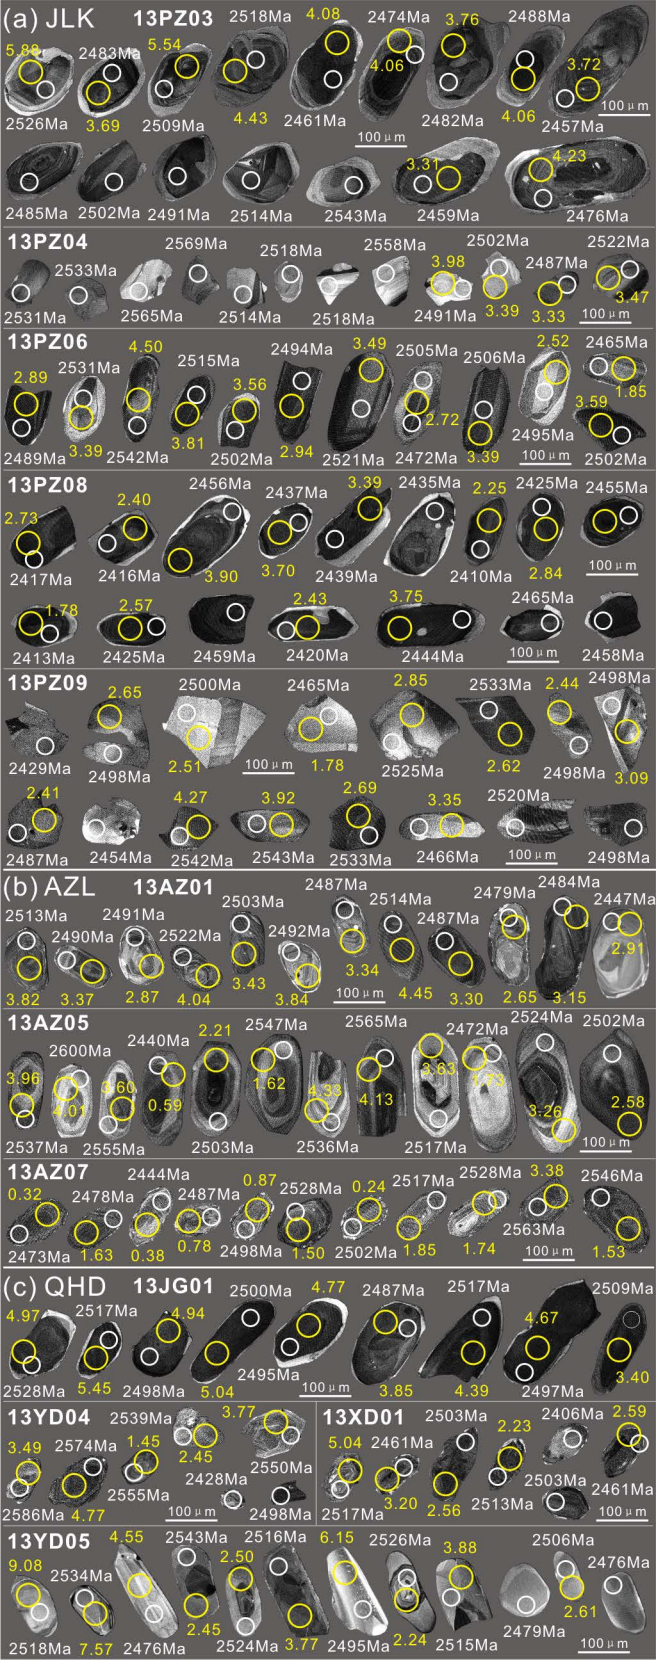

Supplement: Supplementary file 1 [file 1]
